# Supplementary material for: Molecular dynamics simulations of aqueous glycine solutions
Source: Royal Society of Chemistry journal article supplement (doi:10.1039/c7ce01271c), 2017-01-01
Supplement: c7ce01271c1.pdf [file c7ce01271c1.pdf]

## Electronic Supplementary Information

### **Molecular dynamics simulations of aqueous glycine solutions**

Yuriy G. Bushuev,\* Svetlana V. Davletbaeva, Oscar I. Koifman  
Ivanovo State University of Chemistry and Technology, pr. Sheremetevskiy, 7,  
Ivanovo, 153000, Russia. E-mail: [yuriyb2005@gmail.com](mailto:yuriyb2005@gmail.com)

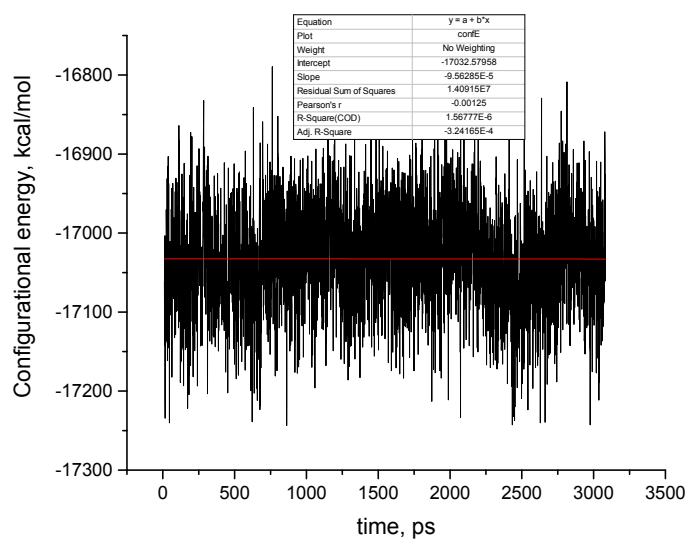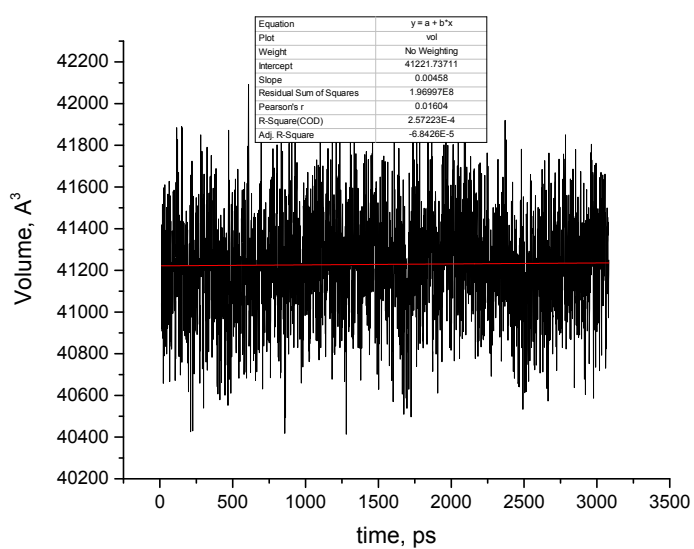

**Fig. S1.** Typical energy and volume fluctuations during the productive run.

**Table S1. Duration of Simulations, ns**

| T=300 K,<br>Charge set | Number of glycine<br>molecules in solution |      |      |
|------------------------|--------------------------------------------|------|------|
|                        | N=12                                       | N=36 | N=72 |
| CNDO                   | 3.8                                        | 3.5  | 4.5  |
| B3LYP                  | 3.0                                        | 3.1  | 3.8  |
| mB3LYP                 | 3.4                                        | 3.0  | 3.4  |

| Duration, ns (mB3LYP, N=72) |         |         |
|-----------------------------|---------|---------|
| Electric field              | T=300 K | T=350 K |
| E=0 V/m                     | 3.4     | 3.3     |
| E=10 <sup>3</sup> V/m       | 4.0     | 3.3     |
| E=10 <sup>4</sup> V/m       | 4.3     | 5.3     |

## Calculation of Diffusion Coefficients

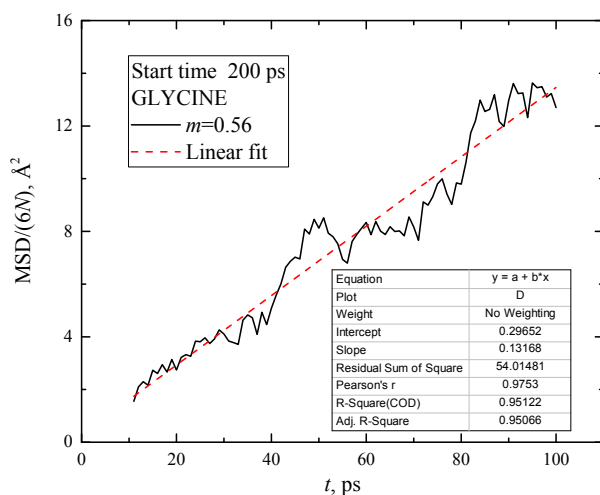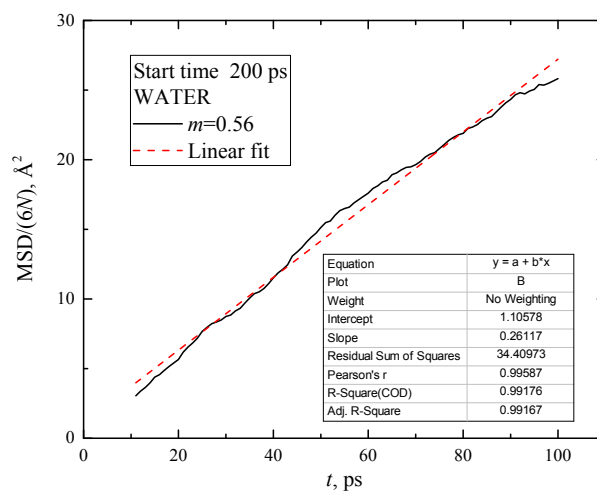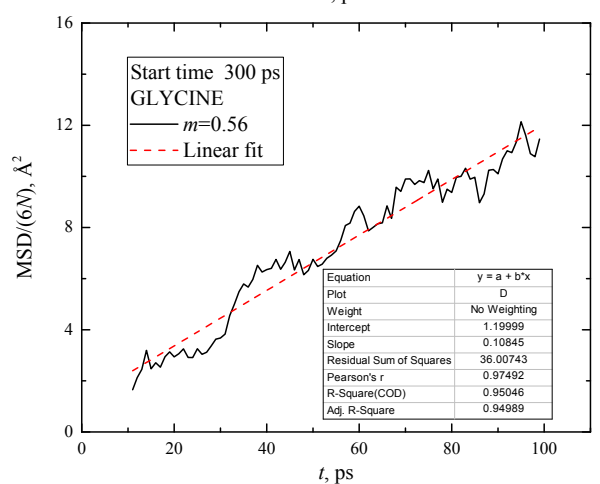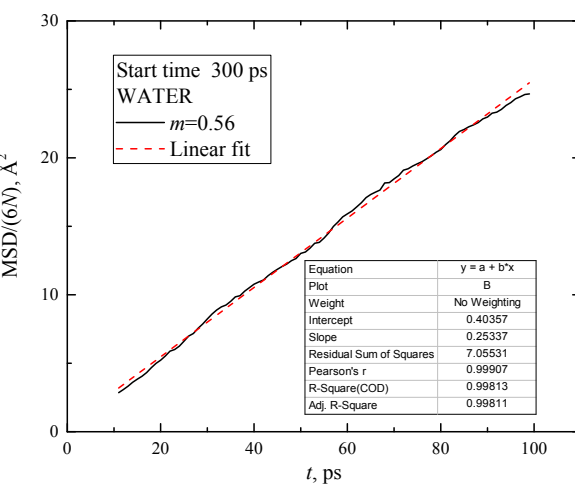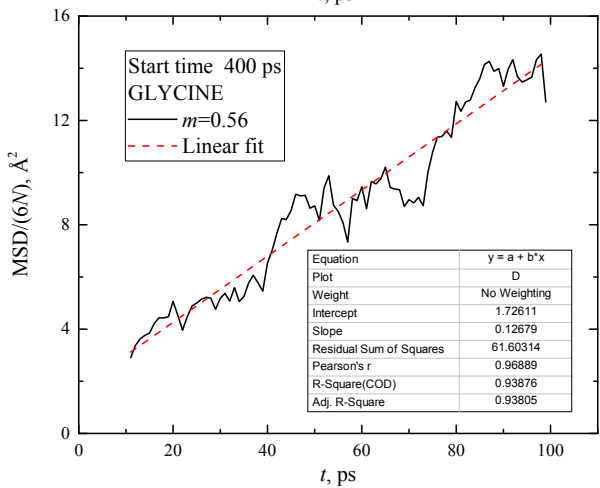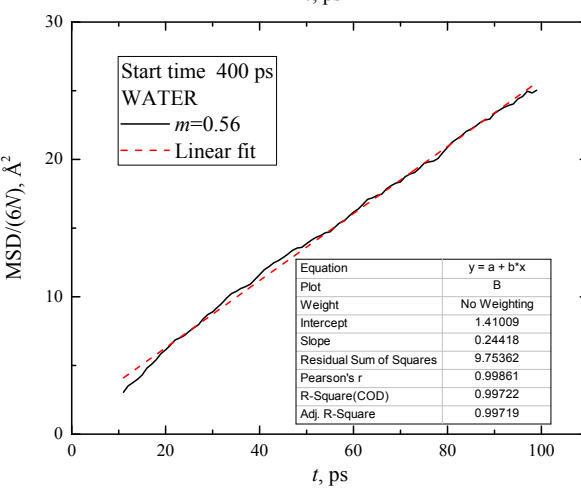

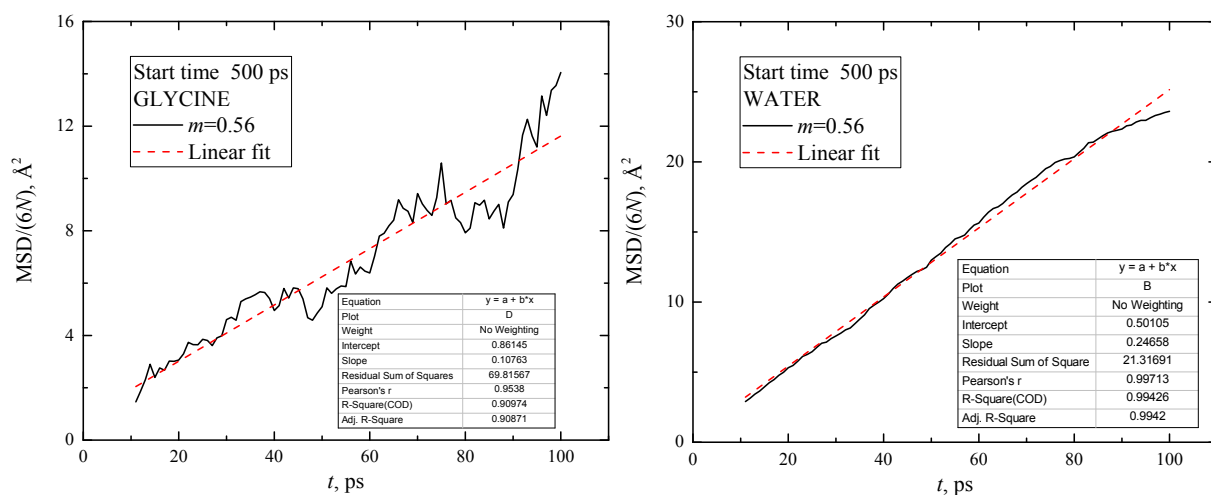

| Mean   | Standard Deviation | SE of mean | Lower 95% CI of Mean | Upper 95% CI of Mean |
|--------|--------------------|------------|----------------------|----------------------|
| 1.1865 | 0.12408            | 0.06204    | 0.98907              | 1.38393              |
| 2.5135 | 0.07636            | 0.03818    | 2.392                | 2.635                |

**Fig. S2.** Mean square displacement of glycine and water molecules during 100 ps time intervals on 0.5 ns trajectory due to diffusion at  $m=0.56$  mol/kg

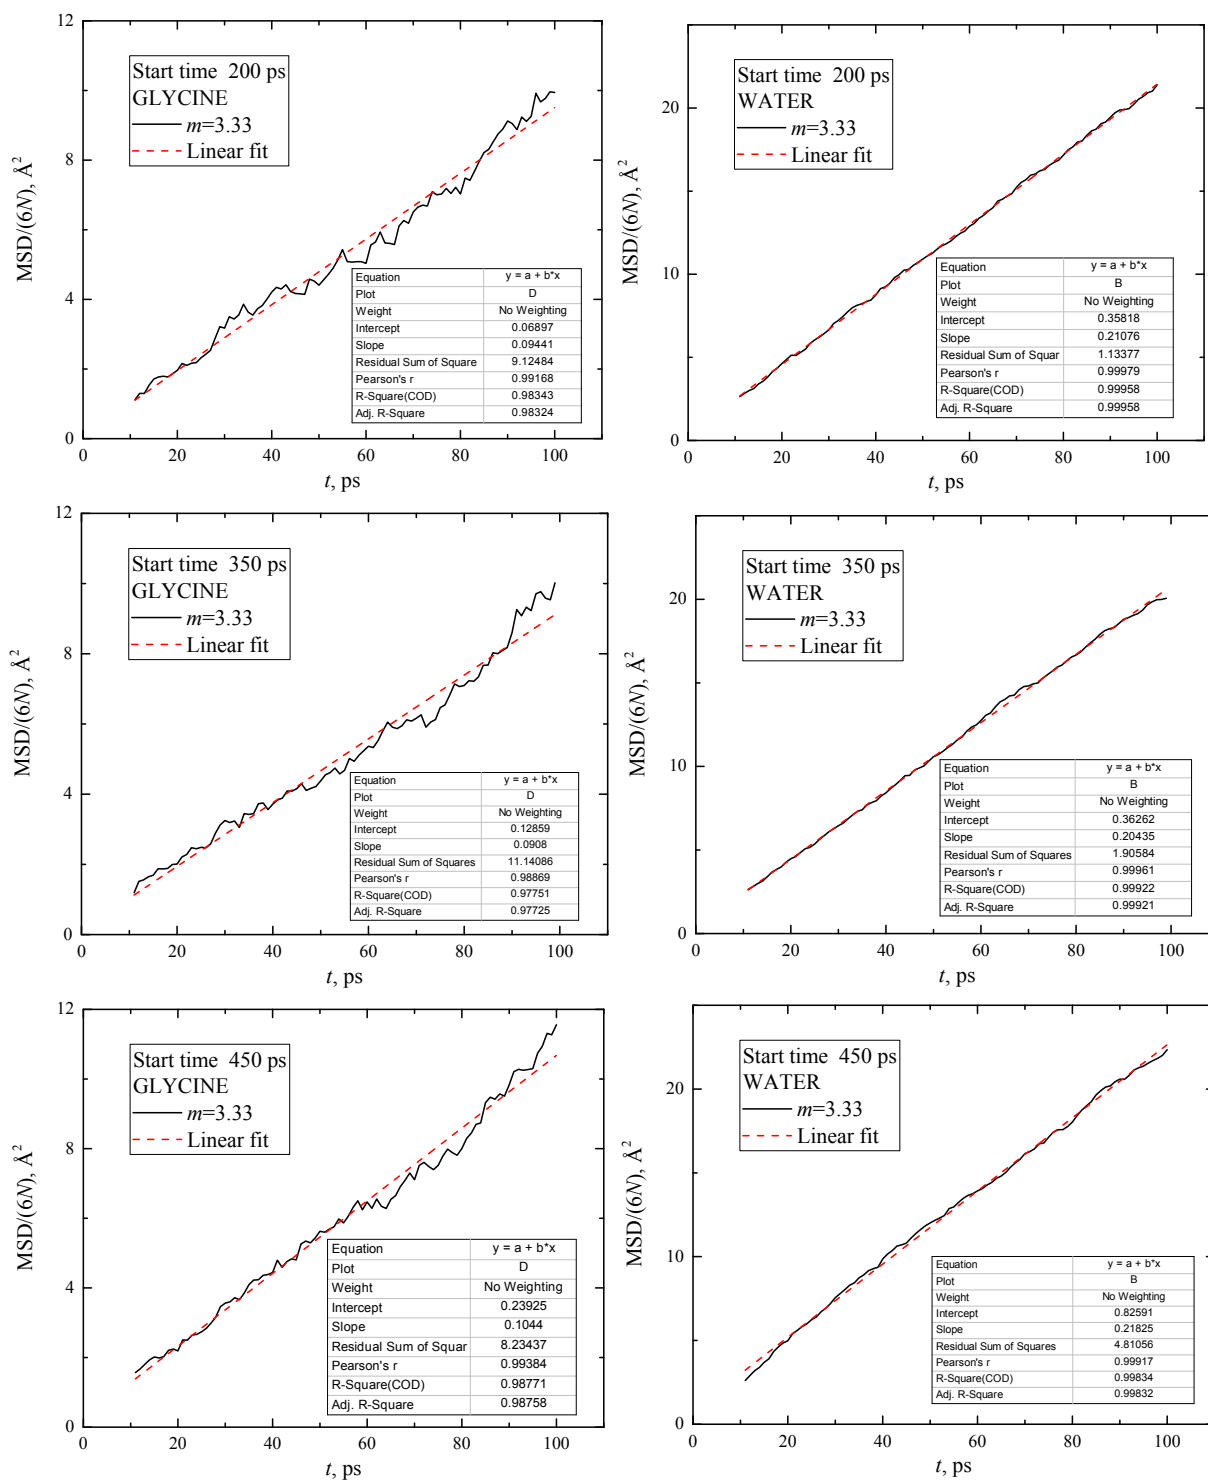

| Mean    | Standard Deviation | SE of mean | Lower 95% CI of Mean | Upper 95% CI of Mean |
|---------|--------------------|------------|----------------------|----------------------|
| 0.96533 | 0.07047            | 0.04068    | 0.79029              | 1.14038              |
| 2.11167 | 0.06957            | 0.04017    | 1.93884              | 2.28449              |

**Fig. S3.** Mean square displacement of glycine and water molecules during 100 ps time intervals due to diffusion at  $m=3.33$  mol/kg

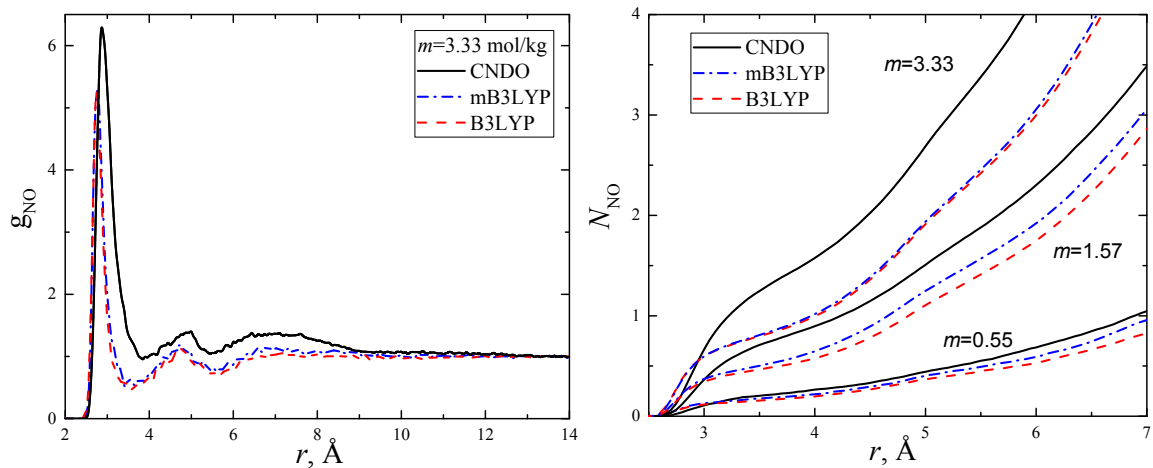

**Fig. S4** Radial distribution functions,  $g_{\text{NO}}(r)$ , and running coordination numbers,  $N_{\text{NO}}(r)$ , for nitrogens and oxygens of glycine in aqueous solutions with various solute concentrations,  $m$ .

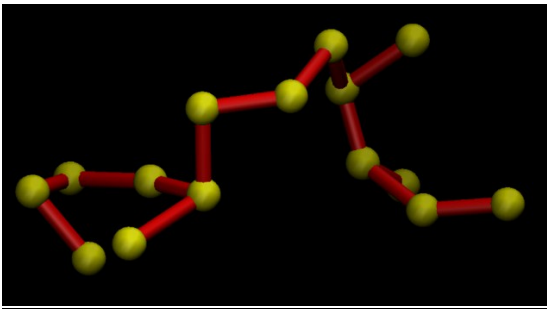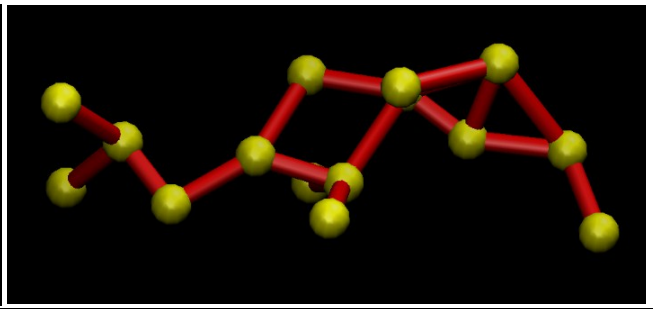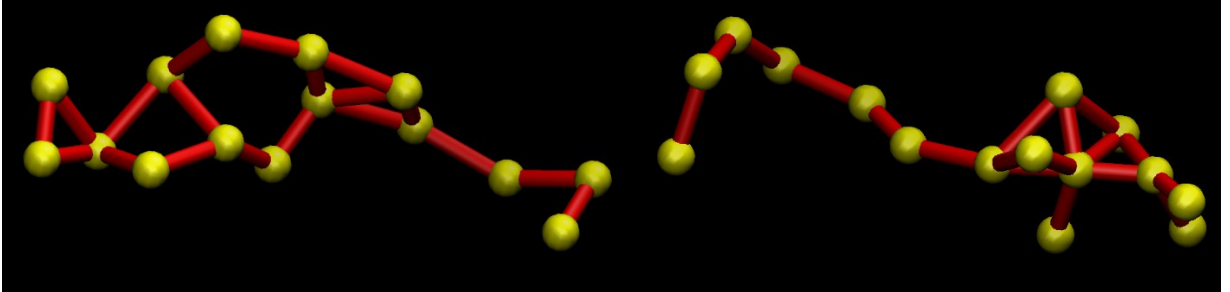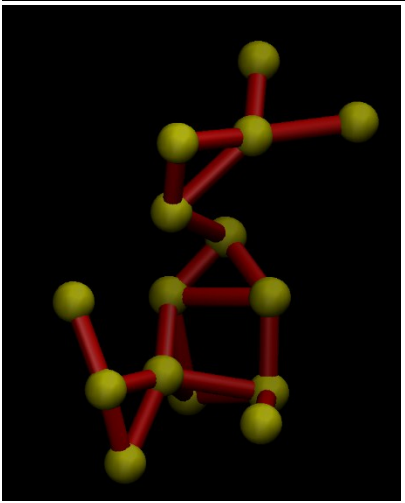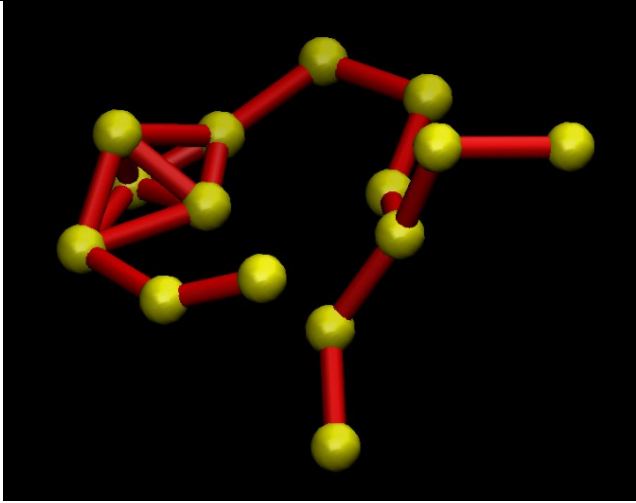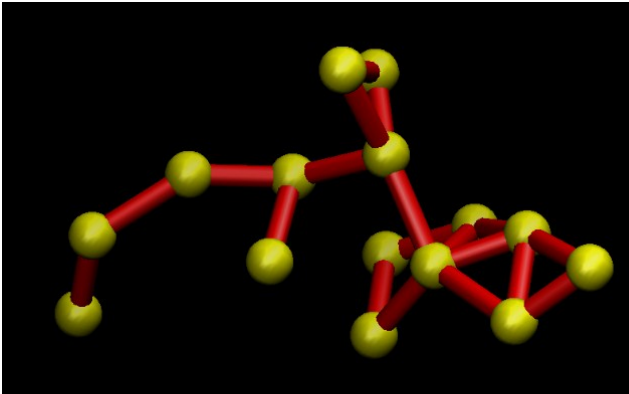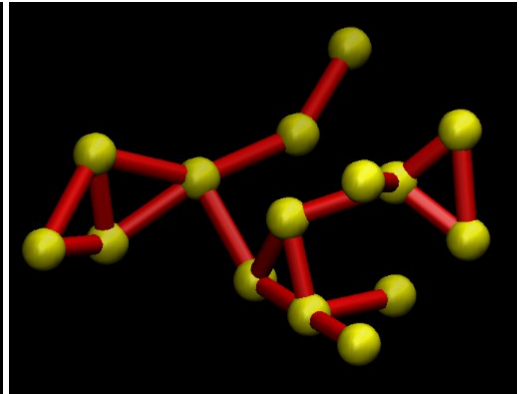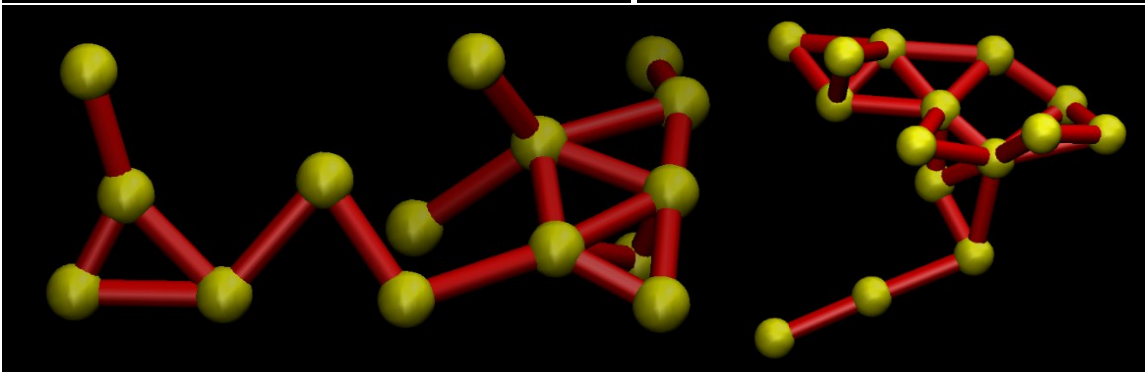



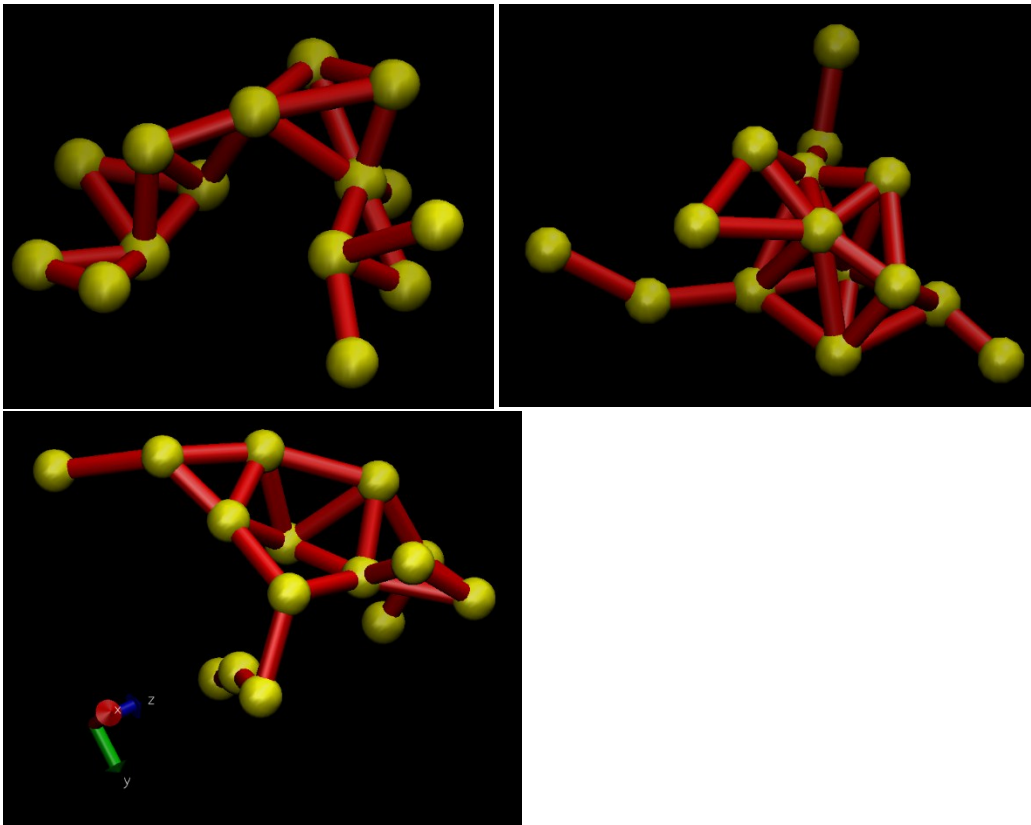

**Fig. S5.** Glycine clusters consisting from 15 glycine molecules, nitrogen atoms are presented by yellow balls. Sticks connect the nearest nitrogens.

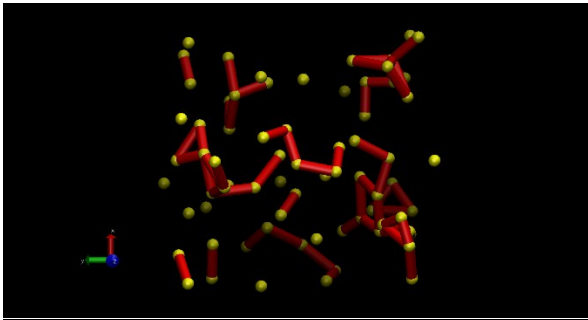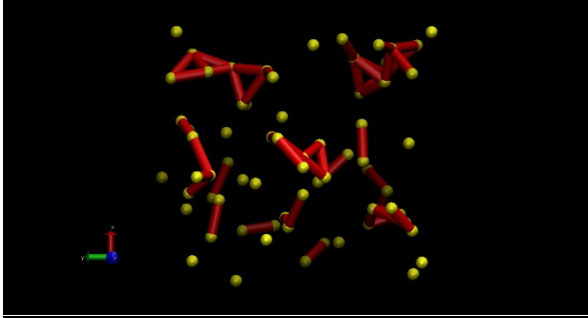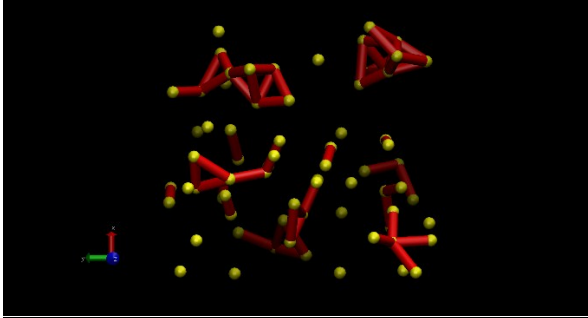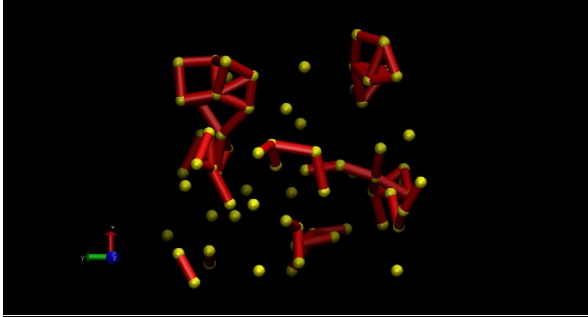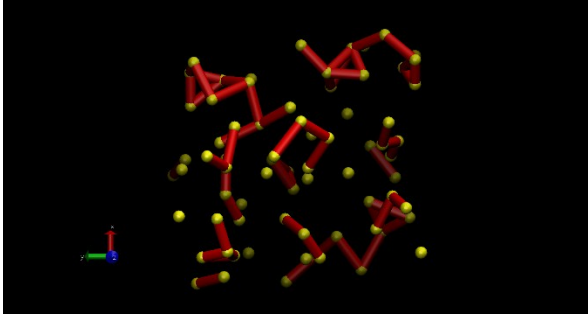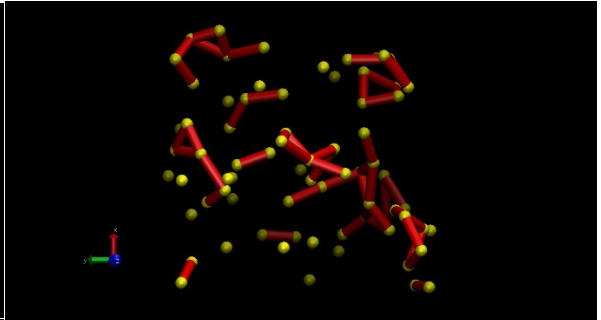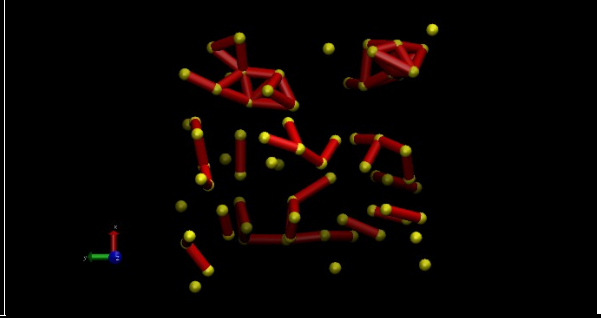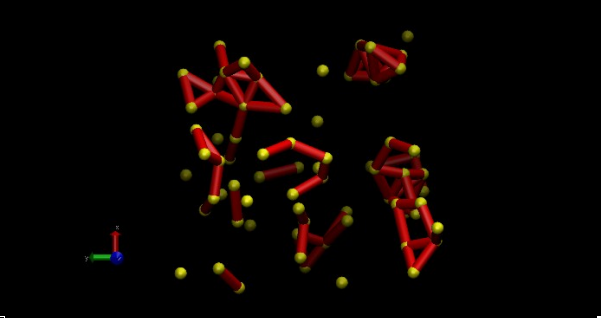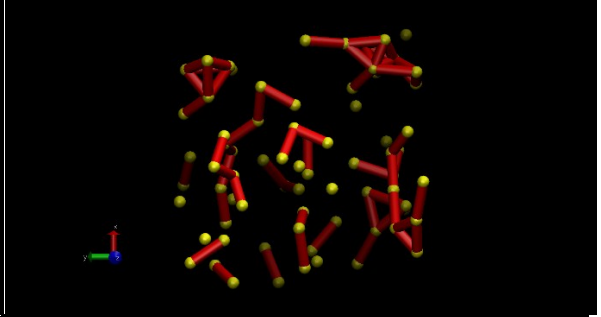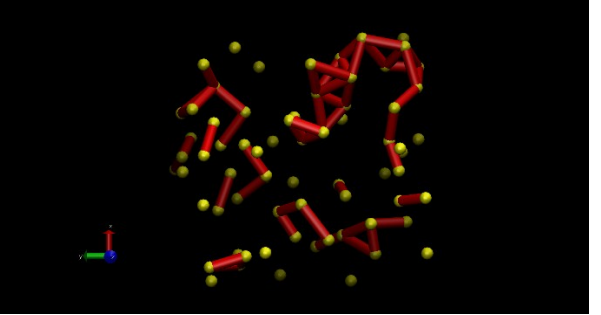

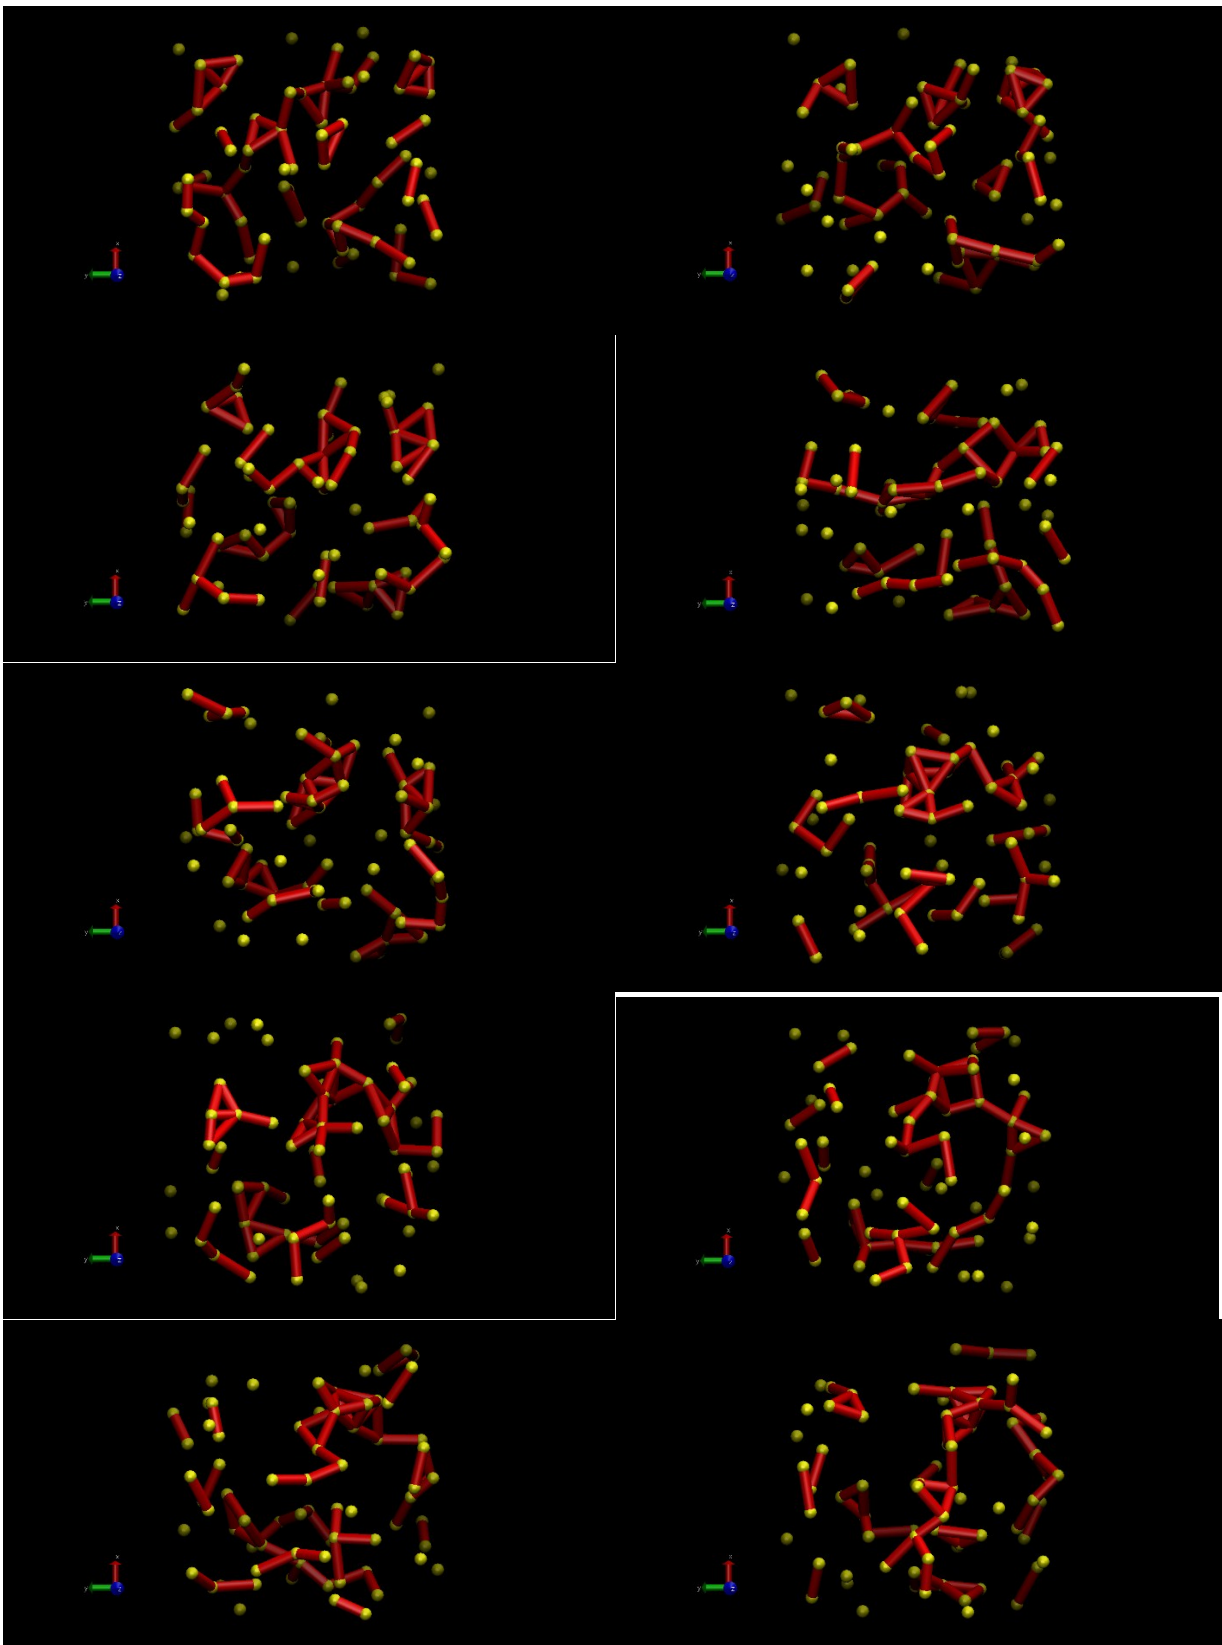

**Fig. S6.** Snapshots of the simulation box at  $m=3.33$  mol/kg. Nitrogen atoms are presented by yellow balls. Sticks connect the nearest nitrogens. Water molecules are not shown for clarity. Time interval between snapshots is equal to 10 ps.

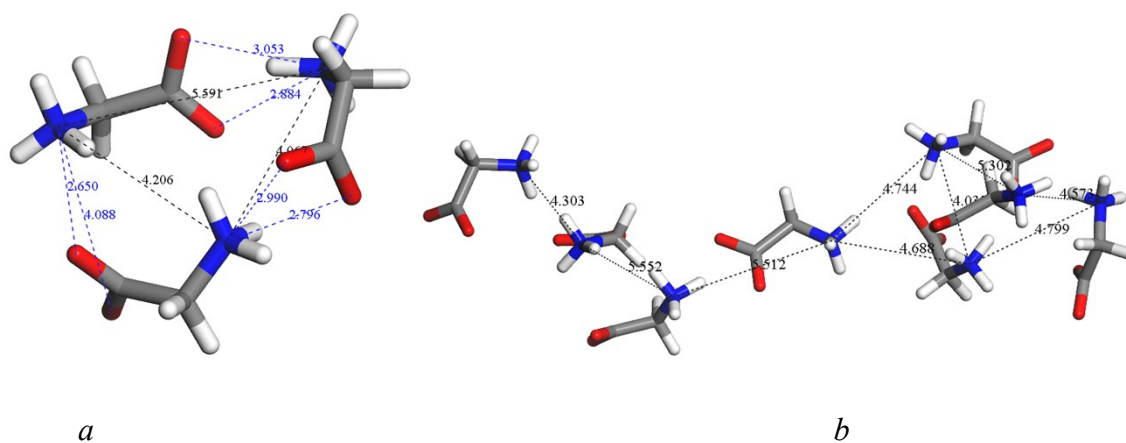

**Fig. S7.** Small glycine clusters in aqueous solution at  $m=3.33$  mol/kg

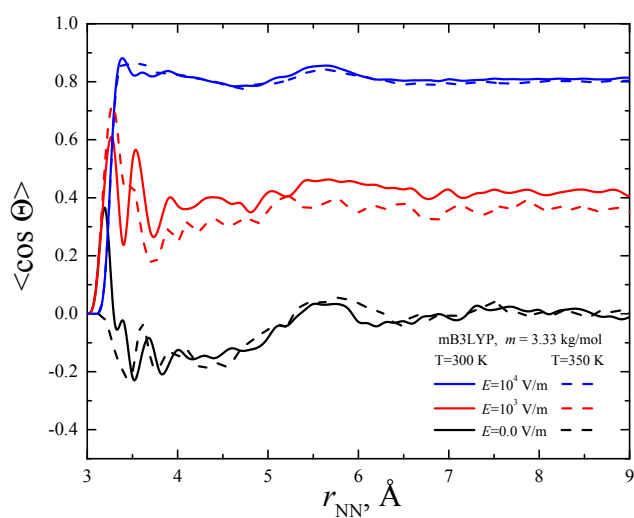

**Fig. S8.** Average cosine of the angle between vectors connecting carbon atoms ( $\text{H}_2\text{C} \rightarrow \text{CO}_2$ ) in two glycine molecules calculated without and with dc electric field ( $E=10^3$  and  $10^4$  V/m) applied to solution at  $m=3.33$  mol/kg ( $T=300$  K and  $350$  K)

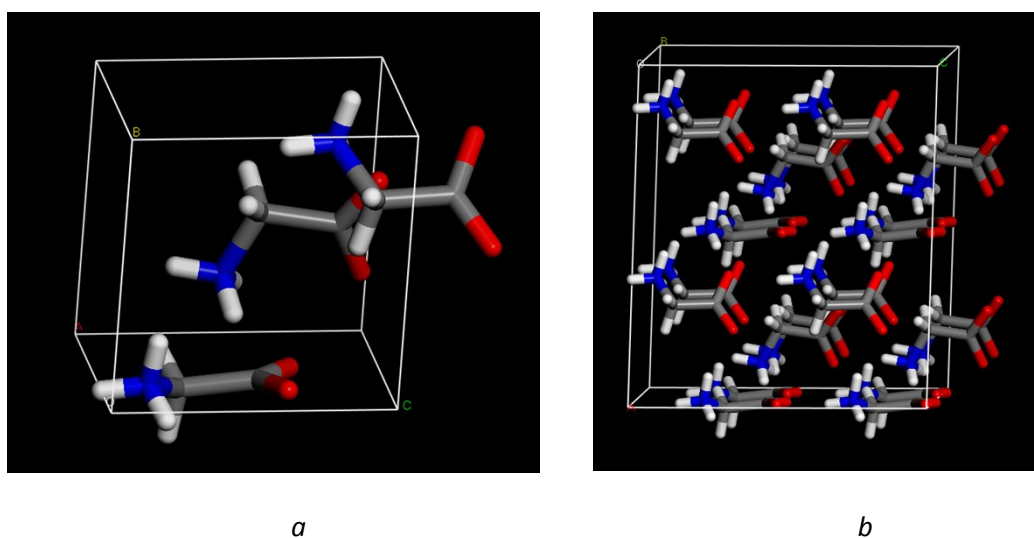

**Fig. S9.** (a) Crystallographic unit cell of  $\gamma$ -glycine, (b)  $2 \times 2 \times 2$  unit cells.

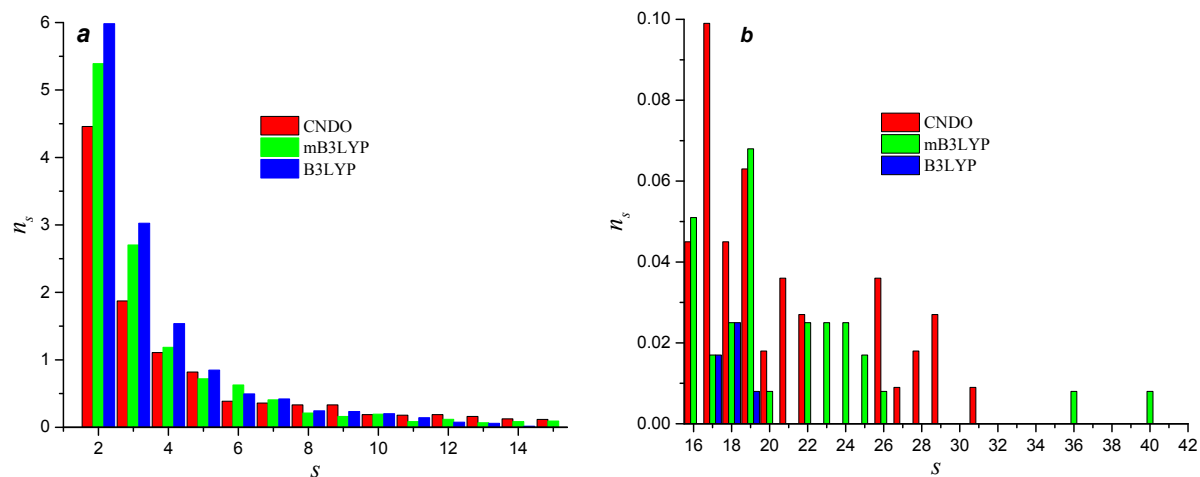

**Fig. S10.** Number of glycine clusters,  $n_s$ , in the saturated aqueous solution as a function of cluster size,  $s$ : (a) for small clusters, (b) for other clusters.

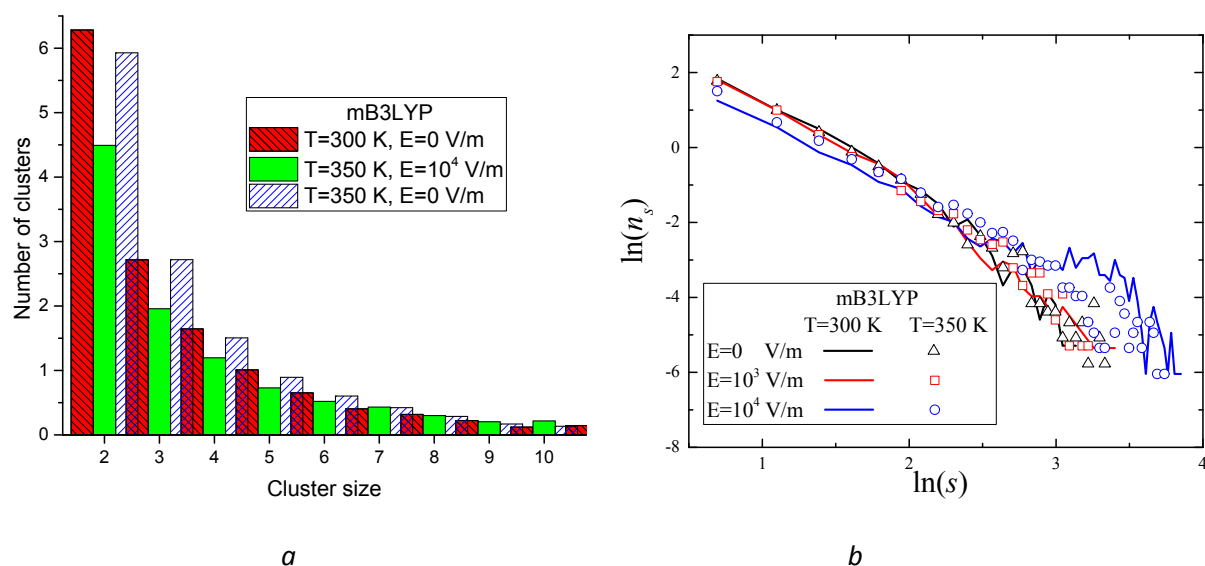

**Fig. S11.** Number of glycine clusters,  $n_s$ , in the saturated aqueous solution as a function of cluster size,  $s$ : (a) for small clusters, (b) for all clusters. The mB3LYP force field is used. Data calculated at 300 K and 350 K for solutions in the electric field and without the electric field are presented.

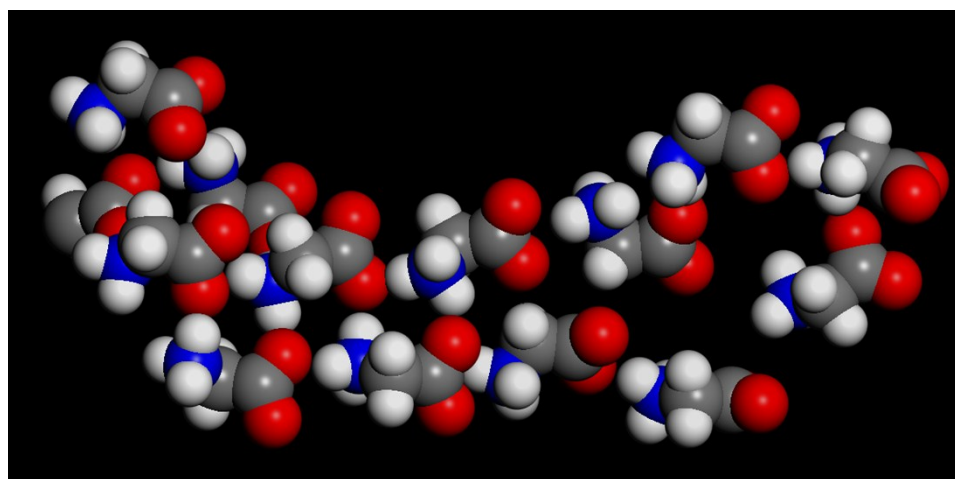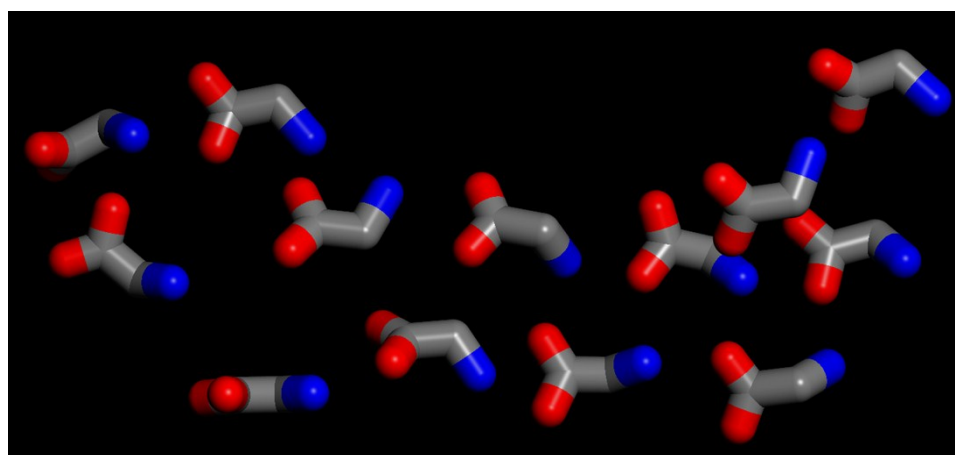

*a*

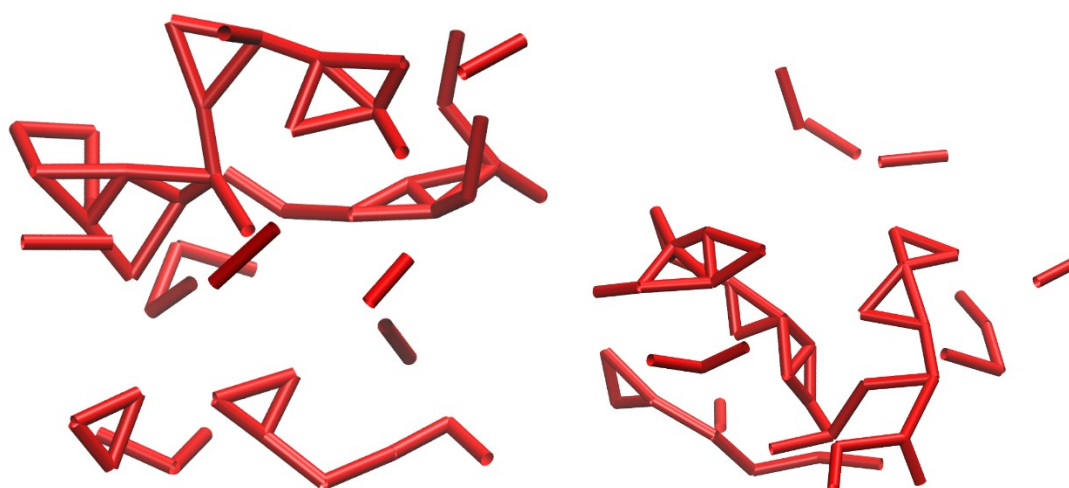

*b*

**Fig. S12.** Glycine clusters observed in aqueous solutions at  $m=3.33$  mol/kg and  $E=10^4$  V/m. (a) stripe-like clusters; (b) chain-like and stripe-like clusters, sticks connect the nearest nitrogens ( $r_{NN} < 6 \text{ \AA}$ ), water molecules and monomers are not shown for clarity.

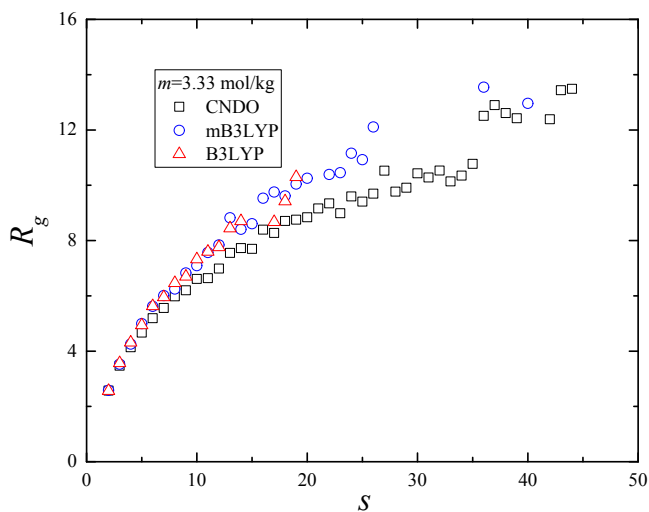

**Fig. S13.** Radius of gyration,  $R_g$ , of glycine clusters in the saturated aqueous solution as a function of cluster size,  $s$ .

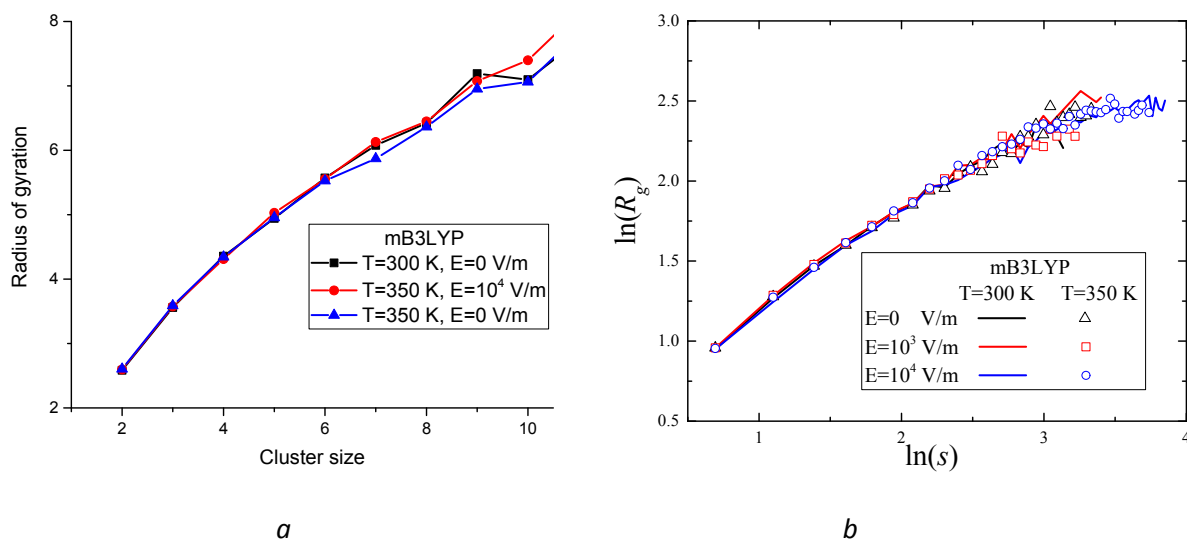

**Fig. S14.** Radius of gyration,  $R_g$ , of glycine clusters in the saturated aqueous solution as a function of cluster size,  $s$ : (a) for small clusters, (b) for all clusters. The mB3LYP force field is used. Data calculated at 300 K and 350 K for solutions in the electric field and without the electric field are presented.

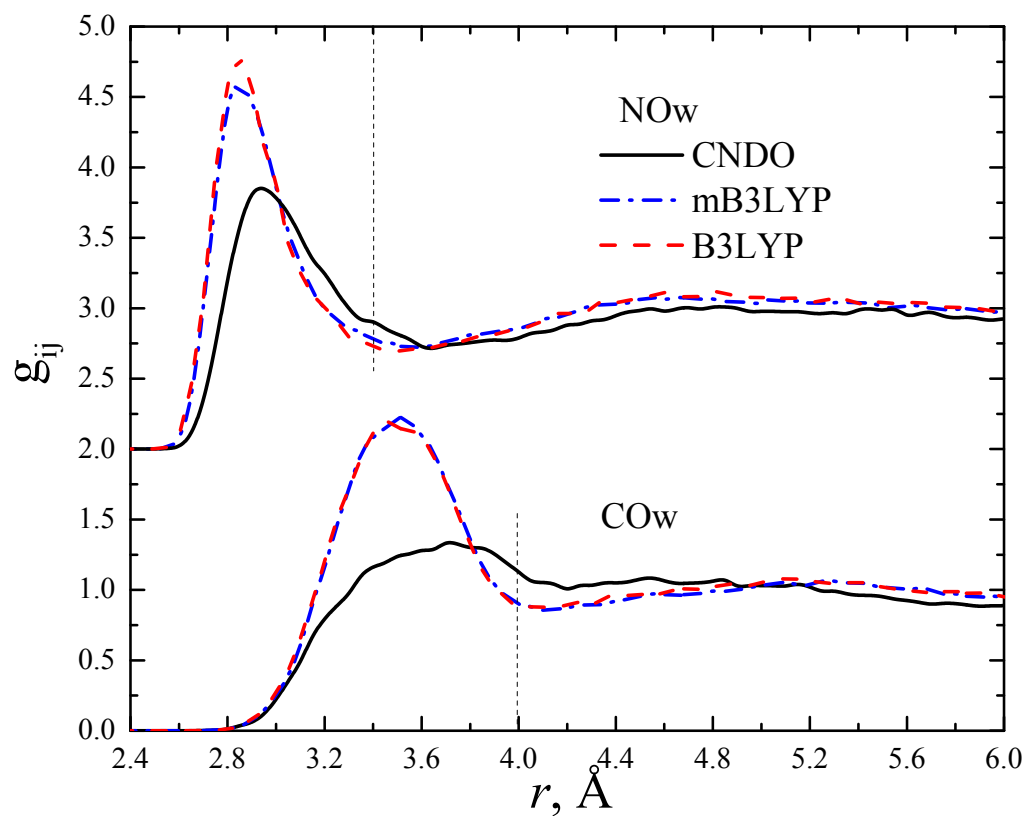

**Fig. S15.** Radial distribution functions,  $g(r)$ , of water oxygens with respect to nitrogens (NOW) and carbons of  $-\text{COO}$  groups (COW).

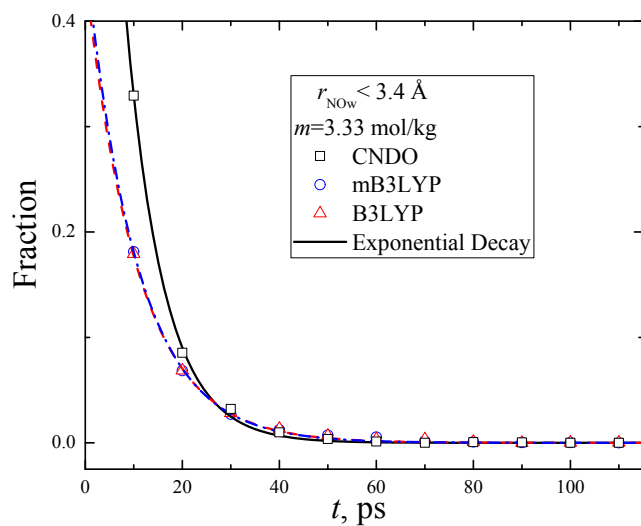

**Fig. S16.** Fractions of water molecules from the first hydration shells of  $-\text{NH}_3$  groups vs. lifetimes



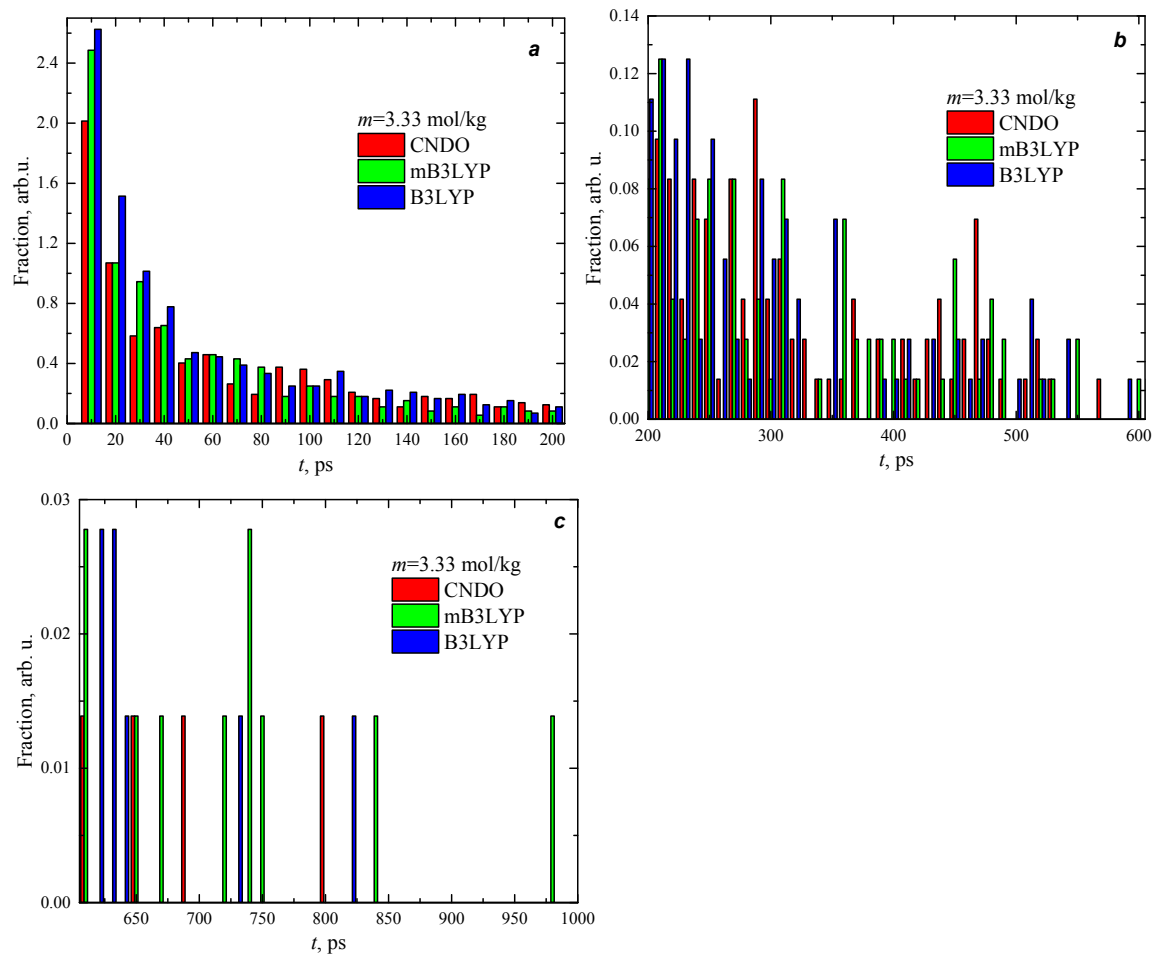

**Fig. S17.** Fractions of glycine molecules vs. lifetimes.
